# Supplementary material for: LINC00184 involved in the regulatory network of ANGPT2 via ceRNA mediated miR-145 inhibition in gastric cancer
Source: J Cancer. 2021 Feb 22;12(8):2336–50. doi: 10.7150/jca.49138 (PMC7974899; doi:10.7150/jca.49138)

Supplement Table 1. The sequence information of the biomarkers

|                | Orientation   | Sequence (5' to 3')           |
|----------------|---------------|-------------------------------|
| ANGPT2         | Forward       | GTGATTGATTCGGATACTGAC         |
|                | Reverse       | CTGGACCTGATATTGCTTCT          |
| miR-145        | reverse       | GTCGTATCCAGTGCAGGGTCCGAGGTATT |
|                | transcription | CGCACTGGATACGACAGGGAT         |
|                | Forward       | GCGGCGGGTCCAGTTTTCCCAG        |
|                | Reverse       | ATCCAGTGCAGGGTCCGAGG          |
| LINC00184      | Forward       | TGAGAAGCAAGGAAGAGAC           |
|                | Reverse       | GTAGATGACGGCACAGTT            |
| U6             | Forward       | GCTTCGGCAGCACATATACTAA        |
|                | Reverse       | AACGCTTCACGAATTTGCGT          |
| si-ANGPT2-1    | SS Sequence   | GAAAGACAACAACAAGUUUCU         |
|                | AS Sequence   | AAACUUGUUGUUGUCUUUCGA         |
| si-ANGPT2-2    | SS Sequence   | GGAUGGAGACAACGACAAAUG         |
|                | AS Sequence   | AAACUUGCACAUAAACAUUCUU        |
| si-LINC00184-1 | SS Sequence   | GCUUAAUGCAGUUAAGUAACA         |
|                | AS Sequence   | UUACUUAACUGCAUUAAGCUG         |
| si-LINC00184-2 | SS Sequence   | GACAAGUGUUGAAGGUGAAAG         |
|                | AS Sequence   | UUCACCUUCAACACUUGUCUU         |

**Supplement Figure 1** *Differentially expressed RNAs in GC*

A-C Heatmaps of top 50 DELs, DEMis and DEMs, identified by edgeR.

D-F. Volcano plots of the expression levels of differentially expressed DELs, DEMis and DEMs, identified by edgeR.

G-I. PCA of DELs, DEMis and DEMs, by edgeR.

J. The down-regulated DELs determined by limma and edgeR.

K. The up-regulated DEMis determined by limma and edgeR.

L. The down-regulated DEMs determined by limma and edgeR.

**Supplement Figure 2** *GO analysis*

A-E: The top 5 biological processes (BP).

F-J: The top 5 molecular functions (MF).

K-O: The top 5 cellular components (CC).

**Supplement Figure 3** *The top 10 KEGG pathways.*

A. cell cycle; B. DNA replication; C. homologous recombination; D. mismatch repair; E. nucleotide excision repair; F. base excision repair; G. RNA degradation; H. one carbon pool by folate; I. ECM receptor interaction; J. spliceosome.

**Figure 4**

A. The soft-thresholding power used to construct scale-free network.

B. Visualization of hierarchical clustering dendrogram of the eigengenes (up).  
Heatmap of the eigengene adjacency (down).

**Supplement Figure 5**

A, B. RT-PCR showed ANGPT2 knockdown in comparison to scrambled control in GC cells.

C, D. PCGEM1 in the cellular portions of SGC-7901s and BGC-823s.

E, F. RT-PCR showed the efficiency of LINC00184 knockdown in comparison to scrambled control in GC cells.

A

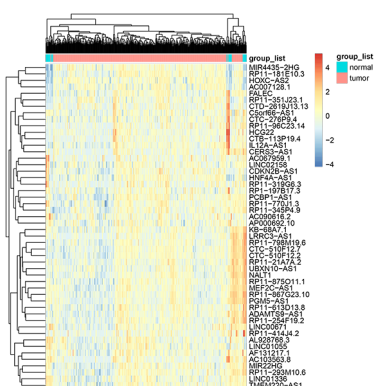

B

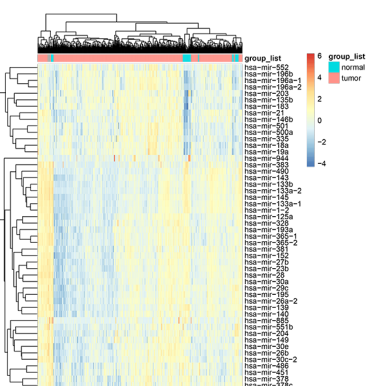

C

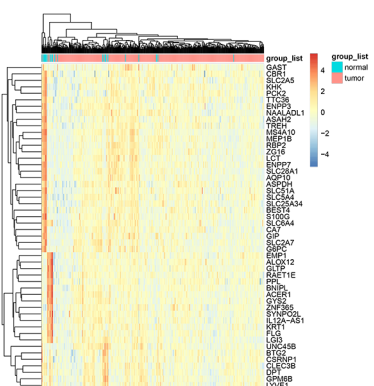

D

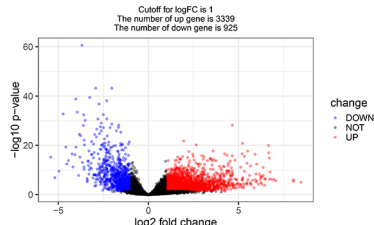

# E

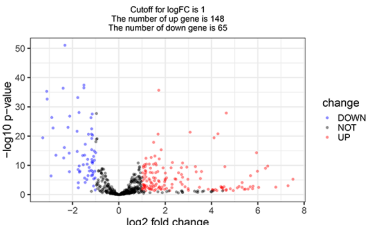

F

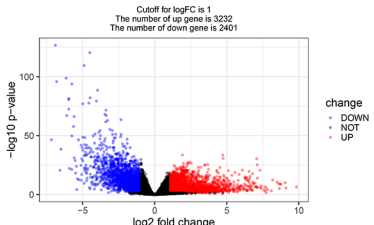

# G

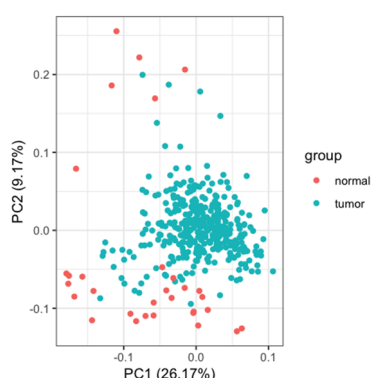

H

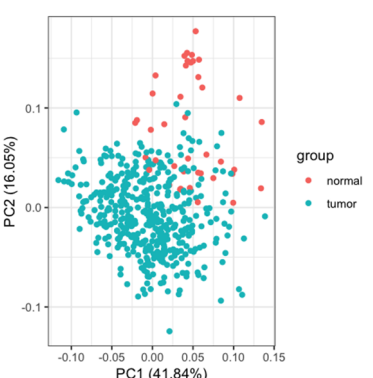

1

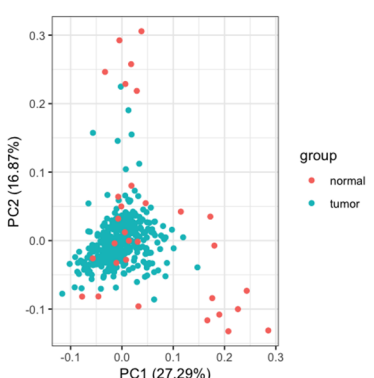

J

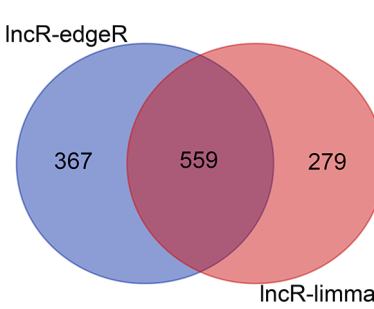

K

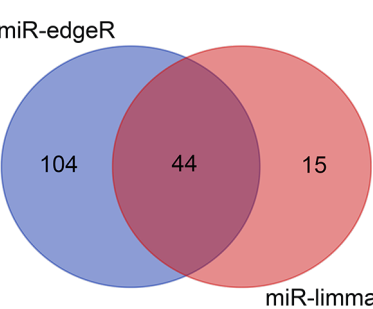

L

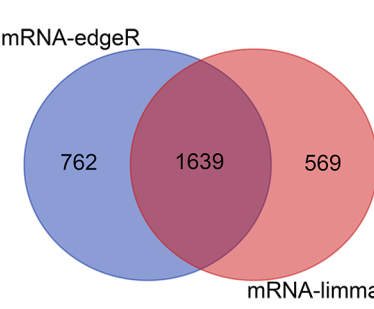

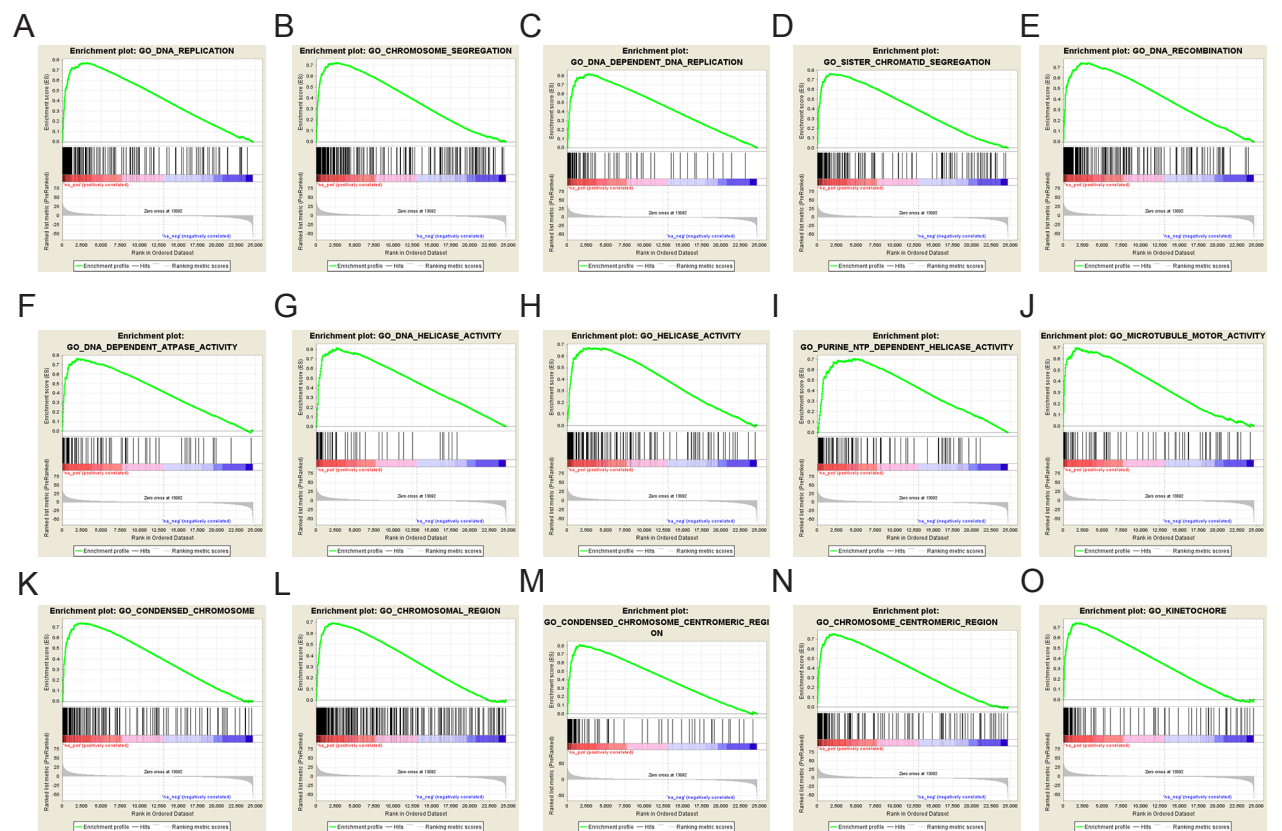

A

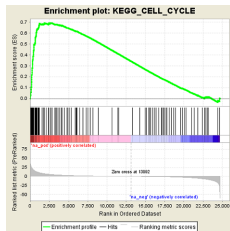

B

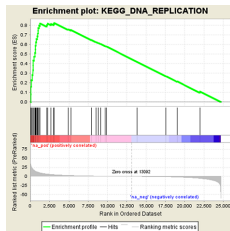

C

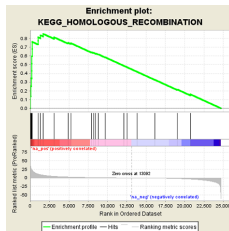

D

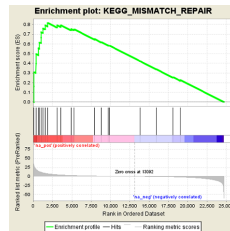

E

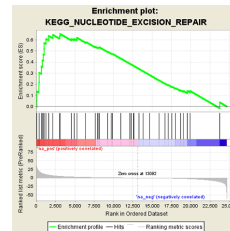

F

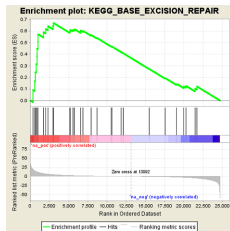

G

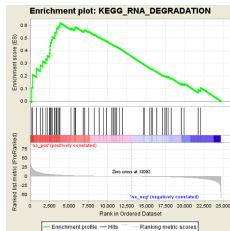

H

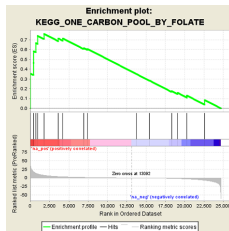

I

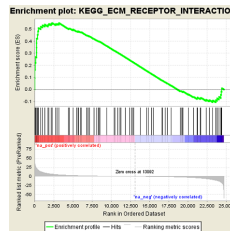

J

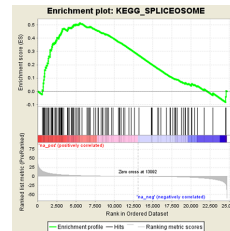

A

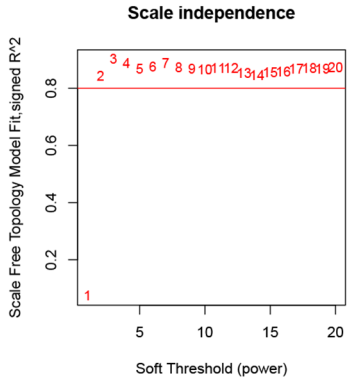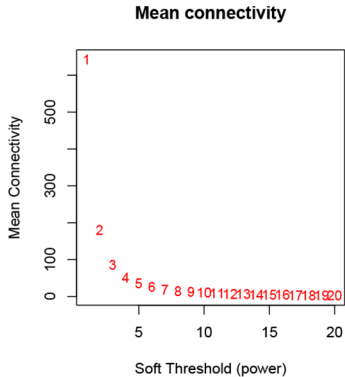

B

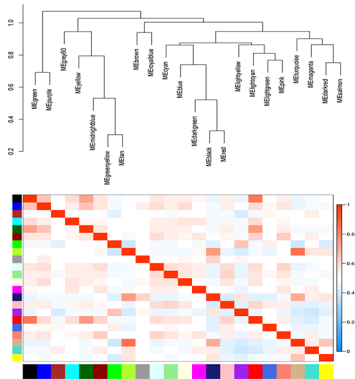

A

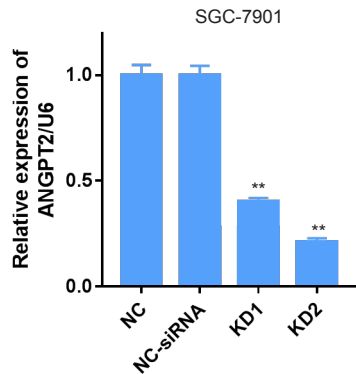

B

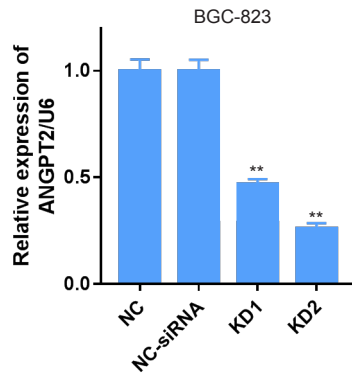

C

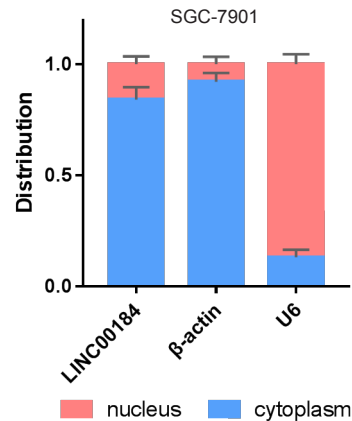

D

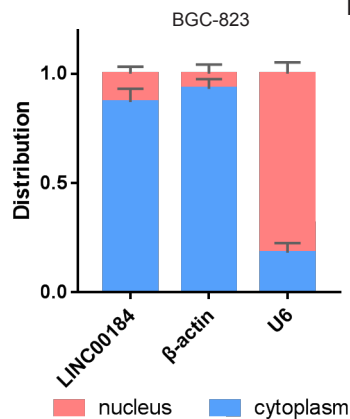

E

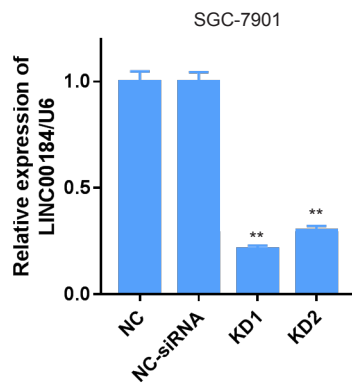

F

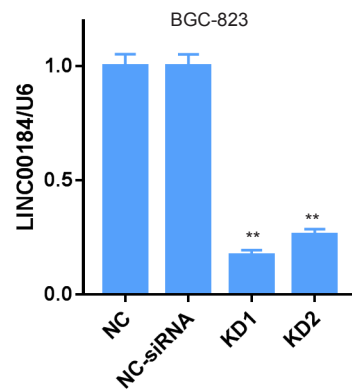

Supplement: Supplementary file 1 — Supplementary figures and tables. [file jcav12p2336s1.pdf]
